# Supplementary material for: Diversity and Seasonal Dynamics of Ticks on Ring-Tailed Coatis Nasua nasua (Carnivora: Procyonidae) in Two Urban Areas from Midwestern Brazil
Source: MDPI journal article supplement (doi:10.3390/ani12030293), 2022-01-25
Supplement: s1 [file s1]

**Diversity and Seasonal Dynamics of Ticks on Ring-Tailed Coatis *Nasua nasua* (Carnivora: Procyonidae) in Two Urban Areas from Midwestern Brazil**

Livia Perles <sup>1</sup>, Thiago Fernandes Martins <sup>2,3</sup>, Wanessa Barreto <sup>4</sup>, Gabriel Carvalho de Macedo <sup>5</sup>, Heitor Herrera <sup>5</sup>, Luis Antônio Mathias <sup>6</sup>, Marcelo Bahia Labruna <sup>2</sup>, Darci Moraes Barros-Battesti <sup>1</sup>, Rosangela Zacarias Machado <sup>1</sup>, and Marcos Rogério André <sup>1,\*</sup>

**Supplementary file.** Voucher material deposited in the IBSP collection.

***Amblyomma* sp.**

10 larvae (IBSP 16757); Parque Estadual do Prosa, Campo Grande Municipality, Mato Grosso do Sul State, Brazil; 02 Aug. 2018; ex. *Nasua nasua* (Linnaeus 1766) (Carnivora: Procyonidae); L. Perles et al. coll.; 5 larvae (IBSP 16774); same locality; same host; 11 May 2018; 4 larvae (IBSP 16802A); 30 May. 2018; 6 larvae (IBSP 16806A); same data; 4 larvae (IBSP 16779); 06 Aug. 2018; 2 larvae (IBSP 16801); 13 Mar. 2018; 1 larva (IBSP 16805); same day; 4 larvae (IBSP 16807B); same locality; same host; 31 Jul. 2018; 8 larvae (IBSP 16809B); 15 Jun. 2018; 2 larvae (IBSP 168010B); 30 May 2018; 7 larvae (IBSP 16812A); 15 Mar. 2018; 1 larva (IBSP 16813); 16 Mar. 2018; 1 larva (IBSP 16814A); 16 Mar. 2018; 1 larva (IBSP 16815B); same data; 3 larvae (IBSP 16816A); 19 Mar. 2018; 3 larvae (IBSP 16816A); 19 Mar. 2018; 1 larva (IBSP 16817B); 20 Mar. 2018; 3 larvae (IBSP 16818A); 21 Mar. 2018; 16 larvae (IBSP 16821B); 15. May 2018; 4 larvae (IBSP 16823A); same data; 31 larvae (IBSP 16822B); 22. May 2018; 5 larvae (IBSP 16824); 28. May 2018; 3 larvae (IBSP 16825); same data; 5 larvae (IBSP 16826); 29 May 2018; 3 larvae (IBSP 16827A); same data; 4 larvae (IBSP 16828B); same data; 18 larvae (IBSP 16804A); 30 May. 2019; 7 larvae (IBSP 16829B); 30 May 2018; 19 larvae (IBSP 16830); 12 Jun. 2018; 9 larvae (IBSP 16831); 12 Jun. 2018; 3 larvae (IBSP 16834A); 31 Jul. 2018; 5 larvae (IBSP 16835C); same data; 3 larvae (IBSP 16836A); 01 Aug. 2018; 16 larvae (IBSP 16837A); 02 Aug. 2018; 4 larvae (IBSP 16839A); 03 Aug. 2018; 9 larvae (IBSP 16840B); same data; 3 larvae (IBSP 16842A); 06 Aug. 2018; 4 larvae (IBSP 16844); 08 Aug. 2018; 13 larvae (IBSP 16765); same host; Vila da Base Aérea, Campo Grande Municipality, Mato Grosso do Sul State, Brazil; 23 March 2019; 3 larvae (IBSP 16766B); same host; same locality; 01 Nov. 2018; 15 larvae (IBSP 16767B); same host; same locality; 30 Jan. 2019; 20 larvae (IBSP 16768); same host; same locality; 29 Jan. 2019; 1 larva (IBSP 16771); 26 Jun. 2018; 7 larvae (IBSP 16772); 29 Jan. 2019; 1 larva (IBSP 16773); 23 Jan. 2019; 33 larvae (IBSP 16777); 30 Apr. 2019; 33 larvae (IBSP 16779B); 06 Aug. 2018; 7 larvae (IBSP 16782); 18 May 2018; 1 larva (IBSP 16785A); 24 Aug 2018; 2 larvae (IBSP 16788); 20 May 2018; 1 larva (IBSP 16793); 21 Mar. 2019; 32 larva (IBSP 16797); 25 Mar. 2019; 20 larva (IBSP 16847A); 30 Apr. 2018; 11 larva (IBSP 16848); 02 May. 2018; 3 larvae (IBSP 16850B); 28 Aug. 2018; 15 larvae (IBSP 16852A); 02 May 2018; 2 larvae (IBSP 16855); same data; 5 larvae (IBSP 16856); 03 May 2018.

***Amblyomma ovale* (Koch 1844)**

1 ♀ (IBSP 16854); Vila da Base Aérea, Campo Grande Municipality, Mato Grosso do Sul State, Brazil; 21 Aug. 2018; ex. *Nasua nasua* (Linnaeus 1766) (Carnivora: Procyonidae); L. Perles et al. coll. 1 ♀ (IBSP 16860B); Vila da Base Aérea, Campo Grande Municipality, Mato Grosso do Sul State, Brazil; 19 May. 2018; ex. *Nasua nasua* (Linnaeus 1766) (Carnivora: Procyonidae); L. Perles et al. coll. 1 ♀ (IBSP 16863C); Vila da Base Aérea, Campo Grande Municipality, Mato Grosso do Sul State, Brazil; 04 May. 2018; ex. *Nasua nasua* (Linnaeus 1766) (Carnivora: Procyonidae); L.

Perles et al. coll. 1 ♂ (IBSP 16862); Vila da Base Aérea, Campo Grande Municipality, Mato Grosso do Sul State, Brazil; 23 Oct. 2018; ex. *Nasua nasua* (Linnaeus 1766) (Carnivora: Procyonidae); L. Perles et al. coll. 1 ♂ (IBSP 16769A); Vila da Base Aérea, Campo Grande Municipality, Mato Grosso do Sul State, Brazil; 20 Aug. 2018; ex. *Nasua nasua* (Linnaeus 1766) (Carnivora: Procyonidae); L. Perles et al. coll. 1 ♀ (IBSP 16864); Vila da Base Aérea, Campo Grande Municipality, Mato Grosso do Sul State, Brazil; 04 May 2018; ex. *Nasua nasua* (Linnaeus 1766) (Carnivora: Procyonidae).

***Amblyomma dubitatum* (Neumann 1899)**

1 nymphae (IBSP 16749); Vila da Base Aérea, Campo Grande Municipality, Mato Grosso do Sul State, Brazil; 23 Jan. 2018; ex. *Nasua nasua* (Linnaeus 1766) (Carnivora: Procyonidae); L. Perles et al. coll. 5 nymphs (IBSP 16750); same data; 2 nymphae (IBSP 16754); same locality and host; 30 April 2019; 1 nymphae (IBSP 16758); same locality; same host; 22 Jan. 2019; 1 nymphae (IBSP 16759A); same locality; same host; 06 Nov. 2018; 1 nymphae (IBSP 16764); same locality; same host; 30 Aug. 2018; 1 nymph (IBSP 16767A); same locality; same host; 30 Jan. 2019; 1 nymphae (IBSP 16770); same locality; same host; 23 Apr. 2019; 1 nymphae (IBSP 16776); same locality; 29 Jan. 2019; same host; 1 nymphae (IBSP 16780B); same locality; 23 Jan. 2019; 1 nymphae (IBSP 16786); 30 Jan. 2019; 1 nymphae (IBSP 16787); 31 Oct. 2018; 1 nymphae (IBSP 16798); same locality; same host; 24 Aug. 2018; 1 nymphae (IBSP 16753B); Parque Estadual do Prosa, Campo Grande Municipality, Mato Grosso do Sul State, Brazil; 04 Oct. 2018; ex. *Nasua nasua* (Linnaeus 1766) (Carnivora: Procyonidae); L. Perles et al. coll. 1 nymphae (IBSP 16800); 31 July 2018; 1 nymphae (IBSP 16803B); 13 Mar. 2018; 1 nymphae (IBSP 16806C); Parque Estadual do Prosa, Campo Grande Municipality, Mato Grosso do Sul State, Brazil; 30 May. 2018; ex. *Nasua nasua* (Linnaeus 1766) (Carnivora: Procyonidae); L. Perles et al. coll. 1 nymphae (IBSP 16808B); 14 Mar. 2018; 1 nymphae (IBSP 16812B); 15 Mar. 2018; 1 nymphae (IBSP 16816B); 19 Mar. 2018; 1 nymphae (IBSP 16818B); 21 Mar. 2018; 1 nymphae (IBSP 16819); 21 Mar. 2018; 1 nymphae (IBSP 16827B); Parque Estadual do Prosa, Campo Grande Municipality, Mato Grosso do Sul State, Brazil; 29 May. 2018; ex. *Nasua nasua* (Linnaeus 1766) (Carnivora: Procyonidae); L. Perles et al. coll. 1 nymphae (IBSP 16832A); Parque Estadual do Prosa, Campo Grande Municipality, Mato Grosso do Sul State, Brazil; 31 Jul. 2018; ex. *Nasua nasua* (Linnaeus 1766) (Carnivora: Procyonidae); L. Perles et al. coll. 1 nymphae (IBSP 16833A); Parque Estadual do Prosa, Campo Grande Municipality, Mato Grosso do Sul State, Brazil; 31 Jul. 2018; ex. *Nasua nasua* (Linnaeus 1766) (Carnivora: Procyonidae); L. Perles et al. coll. 1 nymphae (IBSP 16835A); Parque Estadual do Prosa, Campo Grande Municipality, Mato Grosso do Sul State, Brazil; 31 Jul. 2018; ex. *Nasua nasua* (Linnaeus 1766) (Carnivora: Procyonidae); L. Perles et al. coll. 1 nymphae (IBSP 16836B); 01 Aug. 2018; 1 nymphae (IBSP 16838A); 02 Aug. 2018; 1 nymphae (IBSP 16839B); Parque Estadual do Prosa, Campo Grande Municipality, Mato Grosso do Sul State, Brazil; 03 Aug. 2018; ex. *Nasua nasua* (Linnaeus 1766) (Carnivora: Procyonidae); L. Perles et al. coll. 1 nymphae (IBSP 16842B); Parque Estadual do Prosa, Campo Grande Municipality, Mato Grosso do Sul State, Brazil; 06 Aug. 2018; ex. *Nasua nasua* (Linnaeus 1766) (Carnivora: Procyonidae); L. Perles et al. coll. 1 nymph (IBSP 16853C); Vila da Base Aérea, Campo Grande Municipality, Mato Grosso do Sul State, Brazil; 02 May. 2018; ex. *Nasua nasua* (Linnaeus 1766) (Carnivora: Procyonidae); L. Perles et al. coll. 1 nymphae (IBSP 16863B); Vila da Base Aérea, Campo Grande Municipality, Mato Grosso do Sul State, Brazil; 04 May. 2018; ex. *Nasua nasua* (Linnaeus 1766) (Carnivora:

Procyonidae); L. Perles et al. coll. 1 nymphae (IBSP 16878A); Vila da Base Aérea, Campo Grande Municipality, Mato Grosso do Sul State, Brazil; 24 Aug. 2018; 1 nymphae (IBSP 16881); Vila da Base Aérea, Campo Grande Municipality, Mato Grosso do Sul State, Brazil; 31 Oct. 2018; ex. *Nasua nasua* (Linnaeus 1766) (Carnivora: Procyonidae); L. Perles et al. coll. 1 nymphae (IBSP 16882); 31 Aug. 2018.

***Amblyomma sculptum* (Berlese 1888)**

4 nymphae (IBSP 16802B); Parque Estadual do Prosa, Campo Grande Municipality, Mato Grosso do Sul State, Brazil; 30 May. 2018; ex. *Nasua nasua* (Linnaeus 1766) (Carnivora: Procyonidae); L. Perles et al. coll.; 7 nymphae (IBSP 16804B); same data; 18 nymphae (IBSP 16792); same locality; same host; 8 Oct. 2018; 1 nymph (IBSP 16803A); 13 Mar. 2018; 4 nymphae (IBSP 16806B); same locality; same host; 30 May 2018; 9 nymphae (IBSP 16807A); same locality; same host; 31 Jul. 2018; 1 nymph (IBSP 16808A); same locality; same host; 14 Mar. 2018; 3 nymphae (IBSP 16809A); same locality; same host; 15 Jun. 2018; 9 nymphae (IBSP 16790); same locality; same host; 30 Jul. 2018; 10 nymphae (IBSP 16810A); same locality; same host; 30 May 2018; 11 nymphae (IBSP 16755); same locality; same host; 1 Aug. 2018; 1 nymph (IBSP 16814B); same locality; same host; 16 Mar. 2018; 2 nymphae (IBSP 16815A); same data; 1 nymph (IBSP 16817A); same locality; same host; 20 Mar. 2018; 2 nymphae (IBSP 16818C); same locality; same host; 21 Mar. 2018; 2 nymphae (IBSP 16820B); same locality; same host; 22 Mar. 2018; 4 nymphae (IBSP 16822A); same data; 2 nymphae (IBSP 16821A); same locality; same host; 15 Jun. 2018; 7 nymphae (IBSP 16823B); same data; 17 nymphae (IBSP 16762); same locality; same host; 1 Oct. 2018; 1 nymph (IBSP 16828A); same locality; same host; 29 May 2018; 12 nymphae (IBSP 16829A); same locality; same host; 30 May 2018; 30 nymphae (IBSP 16781); same locality; same host; 30 Jul. 2018; 8 nymphae (IBSP 16832B); same locality; same host; 31 Jul. 2018; 6 nymphae (IBSP 16833B); same data; 4 nymphae (IBSP 16834B); same data; 7 nymphae (IBSP 16835B); same data; 7 nymphae (IBSP 16836C); same locality; same host; 01 Aug. 2018; 6 nymphae (IBSP 16837B); same locality; same host; 02 Aug. 2018; 8 nymphae (IBSP 16838B); same data; 11 nymphae (IBSP 16799); same locality; same host; 04 Oct. 2018; 10 nymphae (IBSP 16839C); same locality; same host; 31 Jul. 2018; 11 nymphae (IBSP 16840); same locality; same host; 03 Aug. 2018; 17 nymphae (IBSP 16841); same locality; same host; 03 Aug. 2018; 15 nymphae (IBSP 16779A); same locality; same host; 06 Aug. 2018; 7 nymphae (IBSP 16843); same locality; same host; 07 Aug. 2018; 4 nymphae (IBSP 16844); same locality; same host; 08 Aug. 2018; 17 nymphae (IBSP 16845); same data; 2 nymphae (IBSP 16847B); Vila da Base Aérea, Campo Grande Municipality, Mato Grosso do Sul State, Brazil; ex. *Nasua nasua* (Linnaeus 1766) (Carnivora: Procyonidae); 30 Apr. 2018; L. Perles et al. coll. 7 nymphae (IBSP 16849); same locality; same host; 18 Jun. 2018; 9 nymphae (IBSP 16851); same locality; same host; 23 Oct. 2018; 2 nymphae (IBSP 16852B); same locality; same host; 1 nymph (IBSP 16853B); same data; 19 nymphae (IBSP 16761); same locality; same host; 22 Oct. 2018; 8 nymphae (IBSP 16860A); same locality; same host; 19 Jun. 2018; 1 nymph (IBSP 16861B); same locality; same host; 4 May 2018; 1 nymph (IBSP 16863B); same data; 1 nymph (IBSP 16867A); same locality; same host; 10 May 2018; 2 nymphae (IBSP 16847B); same locality; same host; 33 nymphae (IBSP 16752); same locality; same host; 31 Aug. 2018; 27 nymphae (IBSP 16785B); same locality; same host; 24 Aug. 2018; 4 nymphae (IBSP 16869B); same locality; same host; 21 Jun. 2018; 4 nymphae (IBSP 16870); same locality; same host; 22 Jun. 2018; 13 nymphae (IBSP 16871); same locality; same host; 22

Jun. 2018; 12 nymphae (IBSP 16872B); same locality; same host; 24 Aug. 2018; 1 nymph (IBSP 16873); same locality; same host; 21 Mar. 2018; 11 nymphae (IBSP 16875); same locality; same host; 26 Jun. 2018; 9 nymphae (IBSP 16875B); same locality; same host; 26 Jun. 2018; 14 nymphae (IBSP 16760); same locality; same host; 06 Nov. 2018.

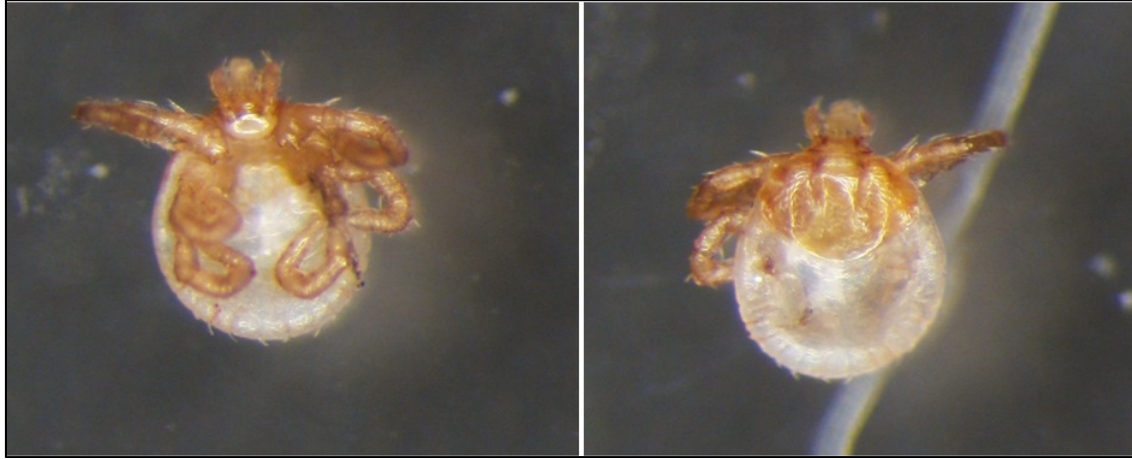

**Figure S1.** Non-engorged *Amblyomma* spp. larvae collected from a ring-tailed coati (*Nasua nasua*) sampled in Campo Grande city, Mato Grosso do Sul state, central-western Brazil. A) Ventral view. B) Dorsal view.

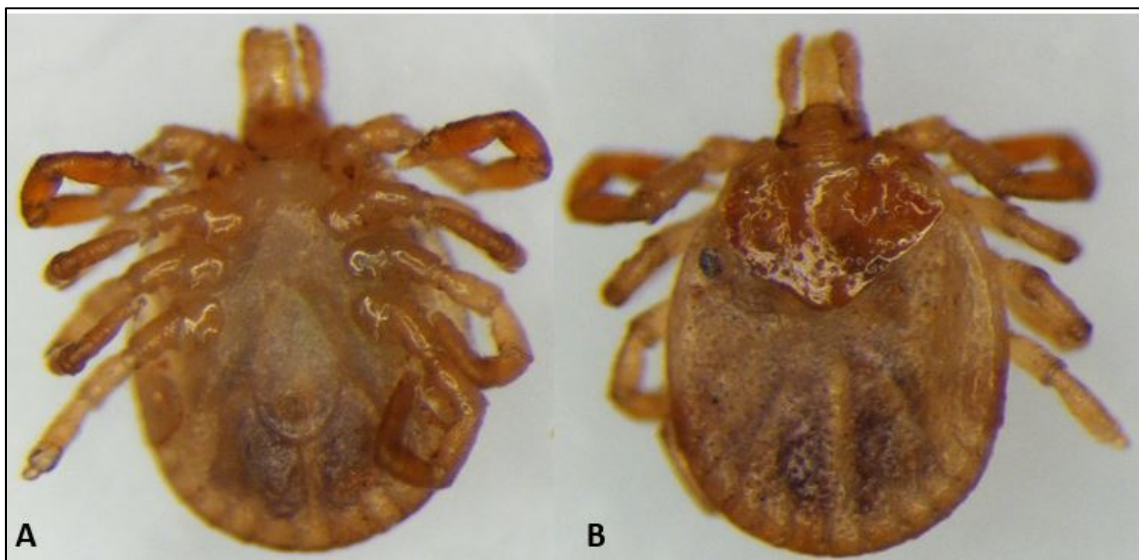

**Figure S2.** *Amblyomma sculptum* nymphs collected from ring-tailed coatis (*Nasua nasua*) sampled in Campo Grande city, Mato Grosso do Sul state, central-western Brazil. A) Ventral view. B) Dorsal view. GenBank accession number: MT974144.



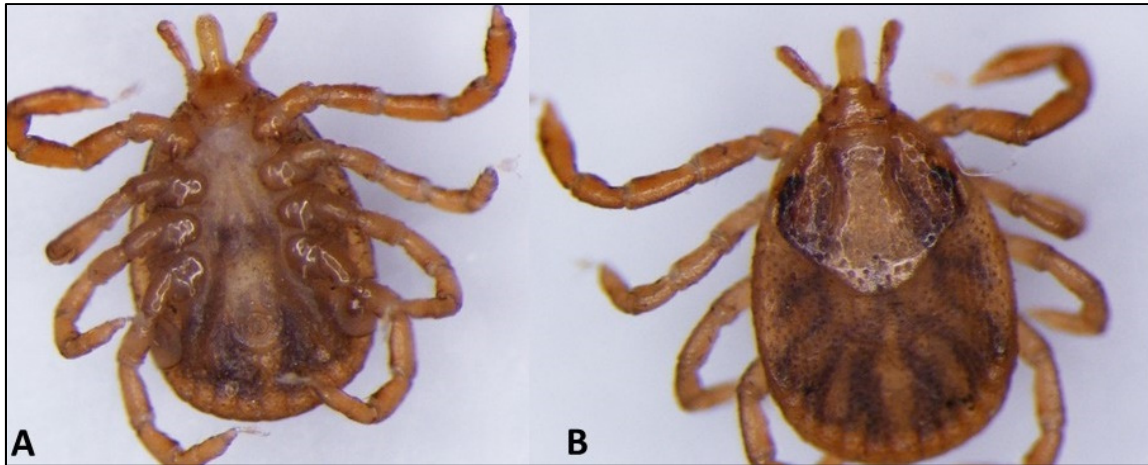

**Figure S3.** *Amblyomma dubitatum* nymphs collected from ring-tailed coatis (*Nasua nasua*) sampled in Campo Grande city, Mato Grosso do Sul state, central-western Brazil. A) Ventral view. B) Dorsal view. GenBank accession number: MT974145.

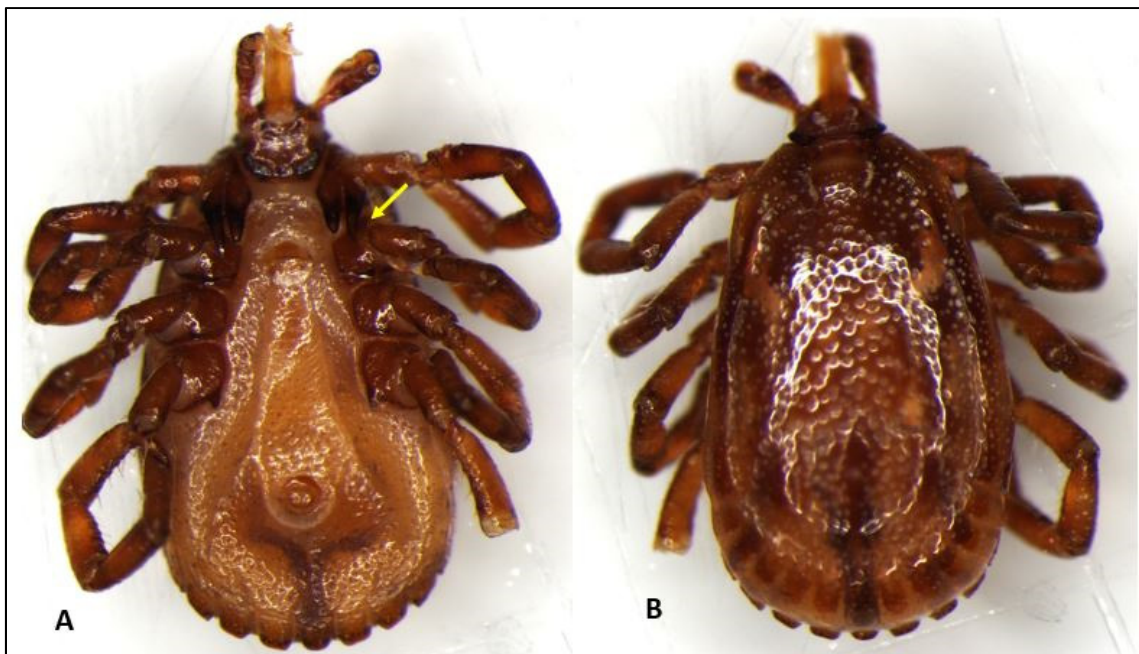

**Figure S4.** *Amblyomma ovale* male collected from a ring-tailed coati (*Nasua nasua*) in Campo Grande city, Mato Grosso do Sul state, central-western Brazil. A) Ventral view: two strong spines can be seen on thigh 1, with the outside spine turned slightly outwards (arrow). B) Dorsal view.

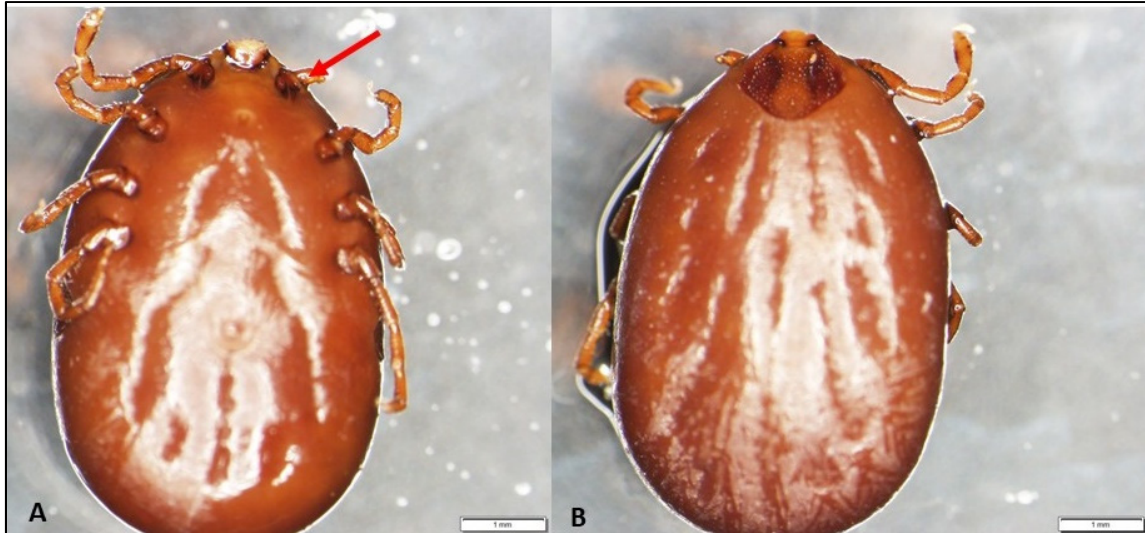

**Figure S5.** *Amblyomma ovale* engorged female collected from a ring-tailed coati (*Nasua nasua*) sampled in Campo Grande city, Mato Grosso do Sul state, central-western Brazil. A) Ventral view: two strong spines can be seen on thigh 1, with the outside spine turned slightly outwards (arrow). B) Dorsal view.

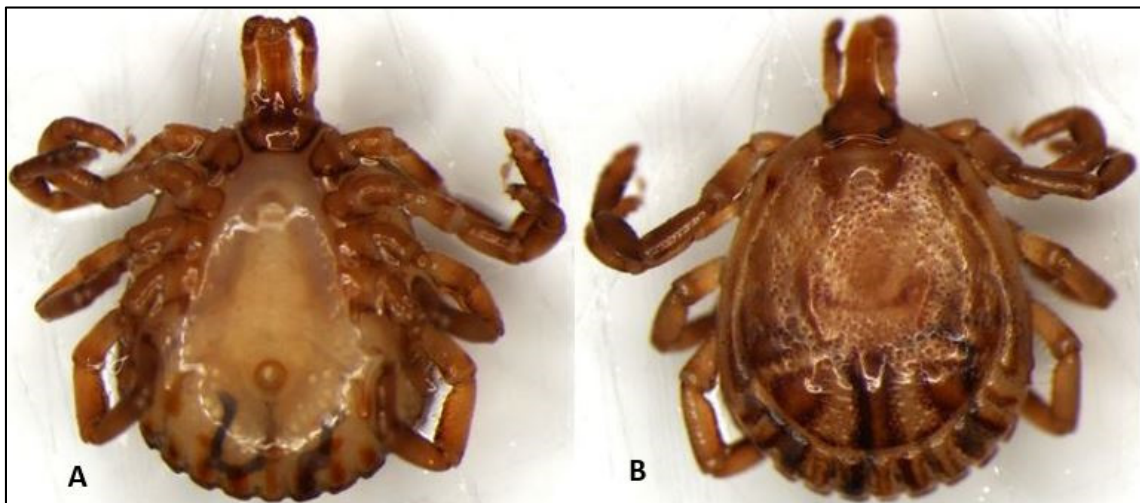

**Figure S6.** *Amblyomma sculptum* male collected from a ring-tailed coati (*Nasua nasua*) sampled in Campo Grande city, Mato Grosso do Sul state, central-western Brazil. A) Ventral view. B) Dorsal view.



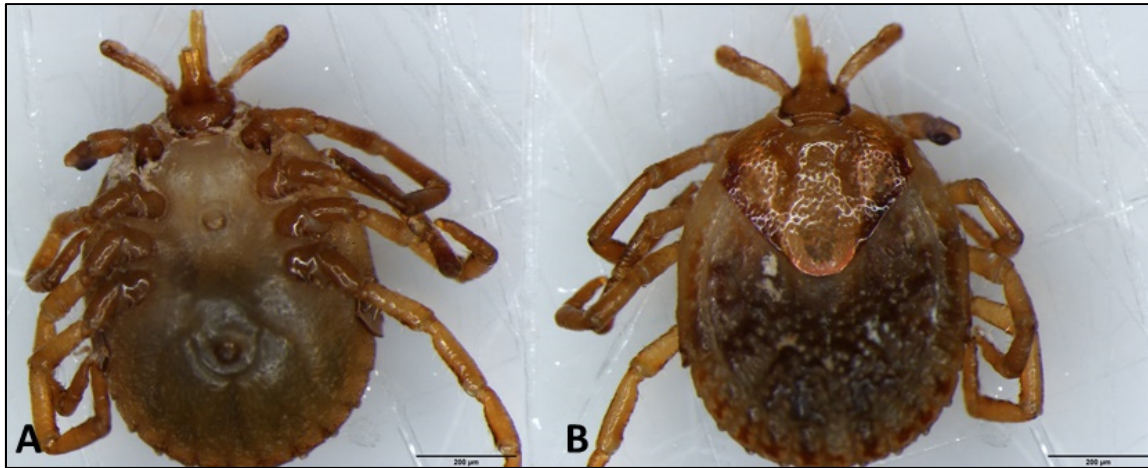

**Figure S7.** *Amblyomma sculptum* non- engorged female sampled in a ring-tailed coati sampled (*Nasua nasua*) in Campo Grande city, Mato Grosso do Sul state, central-western Brazil. A) Ventral view. B) Dorsal view.

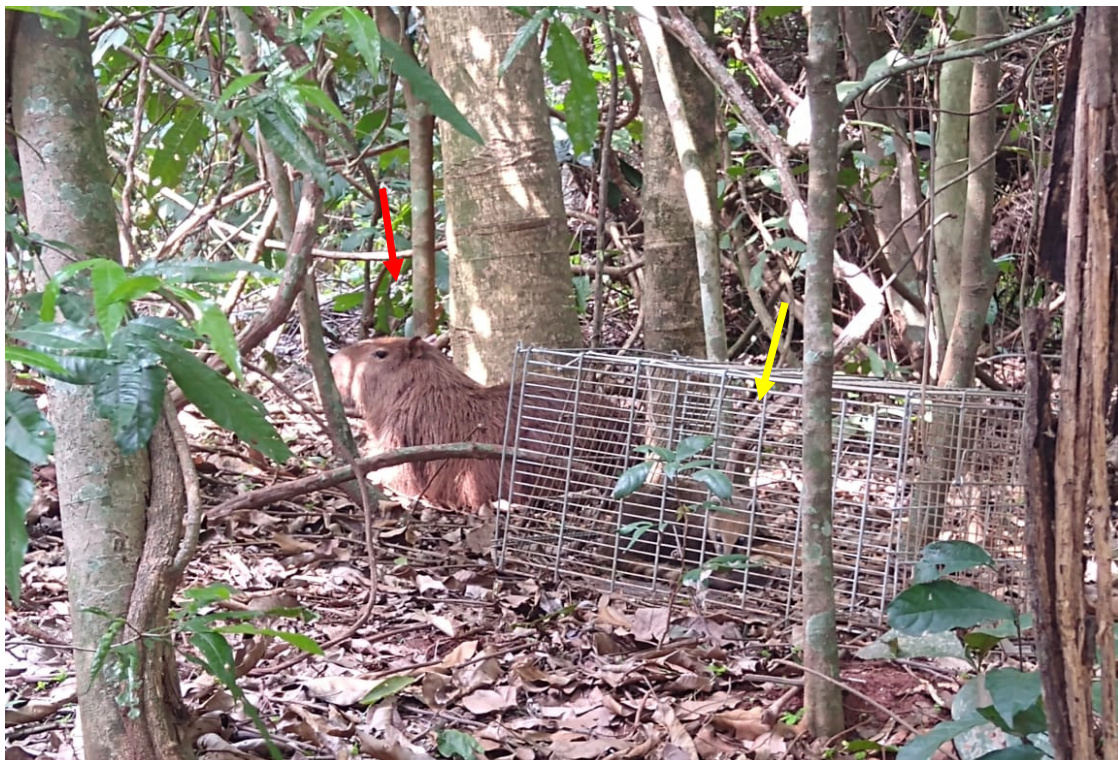

**Figure S8.** Photographic image of a capybara (*Hydrochoerus hydrochaeris*) (red arrow) near a coati (*Nasua nasua*) in a trap (yellow arrow).

**Table S1.** Values of Odds ratio, Confidence interval (inferior and superior) and *p*-value obtained in the analysis on prevalence of ticks on coatis (*Nasua nasua*) sampled from March 2018 to April 2019 in Campo Grande city, Mato Grosso do sul state, Brazil.

| Categorical Independent Variables |          | <i>Amblyomma</i> sp. larvae       |                   | OR    | ICinf | ICsup | <i>p</i> -value |
|-----------------------------------|----------|-----------------------------------|-------------------|-------|-------|-------|-----------------|
|                                   |          | Presence                          | Absence           |       |       |       |                 |
| Locality                          | PEP      | 66.67%<br>(32/48)                 | 33.33%<br>(16/48) | 0.64  | 0.28  | 1.44  | 0.38            |
|                                   | VBA      | 56.36%<br>(31/55)                 | 43.64%<br>(24/55) |       |       |       |                 |
| Sex                               | F        | 68.25%<br>(43/63)                 | 31.75%<br>(20/63) | 0.46  | 0.20  | 1.05  | 0.09            |
|                                   | M        | 50% (20/40)                       | 50%<br>(20/40)    |       |       |       |                 |
| Age                               | Immature | 46.15%<br>(12/26)                 | 53.85%<br>(14/26) | 22.88 | 0.92  | 5.65  | 0.11            |
|                                   | Mature   | 66.23%<br>(51/77)                 | 33.77%<br>(26/77) |       |       |       |                 |
| Categorical Independent Variables |          | <i>Amblyomma dubitatum</i> nymphs |                   | OR    | ICinf | ICsup | <i>p</i> -value |
|                                   |          | Presence                          | Absence           |       |       |       |                 |
| Locality                          | PEP      | 47.92%<br>(23/48)                 | 52.08%<br>(25/48) | 0.67  | 0.30  | 1.47  | 0.42            |
|                                   | VBA      | 38.18%<br>(21/55)                 | 61.82%<br>(34/55) |       |       |       |                 |
| Sex                               | F        | 41.27%<br>(26/63)                 | 58.73%<br>(37/63) | 11.46 | 0.52  | 2.59  | 0.86            |
|                                   | M        | 45%<br>(18/40)                    | 55%<br>(22/40)    |       |       |       |                 |
| Age                               | Immature | 46.15%<br>(12/26)                 | 53.85%<br>(14/26) | 0.82  | 0.33  | 2.02  | 0.85            |
|                                   | Mature   | 41.56%<br>(32/77)                 | 58.44%<br>(45/77) |       |       |       |                 |
| Categorical Independent Variables |          | <i>Amblyomma sculptum</i> nymphs  |                   | OR    | ICinf | ICsup | <i>p</i> -value |
|                                   |          | Presence                          | Absence           |       |       |       |                 |
| Locality                          | PEP      | 75.00%<br>(36/48)                 | 15.00%<br>(12/48) | 10.76 | 0.43  | 2.65  | 1               |
|                                   | VBA      | 76.36%<br>(42/55)                 | 23.64%<br>(13/55) |       |       |       |                 |
| Sex                               | F        | 73.02%<br>(46/63)                 | 26.98%<br>(17/63) | 1.47  | 0.54  | 3.84  | 1               |
|                                   | M        | 80.00%<br>(32/40)                 | 20.00%<br>(8/40)  |       |       |       |                 |
| Age                               | Immature | 76.92%<br>(20/26)                 | 23.08%<br>(6/26)  | 0.91  | 0.32  | 2.58  | 1               |
|                                   | Mature   | 75.32%<br>(58/77)                 | 24.68%<br>(19/77) |       |       |       |                 |

**OR:** Odds Ratio ; **ICinf:** Inferior confidence interval; **ICsup:** Superior confidence interval; **F:** Female; **M:** Male; **PEP:** Parque Estadual do Prosa; **VBA:** Vila da Base Aérea



**Table S2.** *P*-value obtained in the analysis on quantity of ticks (*Amblyomma* sp. larvae, *Amblyomma dubitatum* and *Amblyomma sculptum* nymphs) and the interactions between variables locality, sex and age.

| Variable              | <i>p</i> -value                |                                             |                                            |
|-----------------------|--------------------------------|---------------------------------------------|--------------------------------------------|
|                       | <i>Amblyomma</i><br>sp. larvae | <i>Amblyomma</i><br><i>dubitatum</i> nymphs | <i>Amblyomma</i><br><i>sculptum</i> nymphs |
| Locality              | 0.29                           | 0.21                                        | 0.35                                       |
| Sex                   | 0.94                           | 0.83                                        | 0.76                                       |
| Locality and sex      | 0.47                           | 0.62                                        | 0.83                                       |
| Age                   | 0.51                           | 0.97                                        | 0.30                                       |
| Locality and age      | 0.77                           | 0.17                                        | 0.40                                       |
| Sex and age           | 0.63                           | 0.46                                        | 0.21                                       |
| Locality, sex and age | 0.74                           | 0.97                                        | 0.48                                       |
